# Supplementary material for: Uptake and bioaccumulation of nanoparticles by five higher plants using single-particle-inductively coupled plasma-mass spectrometry
Source: Royal Society of Chemistry journal article supplement (doi:10.1039/d1en01195b), 2022-01-01
Supplement: d1en01195b1.pdf [file d1en01195b1.pdf]

## Supporting information

# **Uptake and bioaccumulation of nanoparticles by five higher plants using single-particle-inductively coupled plasma-mass spectrometry**

Jing Wang<sup>a,b</sup>, Le Yue<sup>a,b</sup>, Jian Zhao<sup>c</sup>, Xuesong Cao<sup>a,b</sup>, Chuanxi Wang<sup>a,b</sup>, Feiran Chen<sup>a,b</sup>,  
Zhenggao Xiao<sup>a,b</sup>, Yan Feng<sup>a,b</sup>, Zhenyu Wang<sup>\*a,b</sup>

*<sup>a</sup> Institute of Environmental Processes and Pollution Control, and School of Environment and Civil Engineering, Jiangnan University, Wuxi 214122, China.*

*<sup>b</sup> Jiangsu Engineering Laboratory for Biomass Energy and Carbon Reduction Technology, Jiangnan University, Wuxi 214122, China.*

*<sup>c</sup> Institute of Coastal Environmental Pollution Control, and Ministry of Education Key Laboratory of Marine Environment and Ecology, Ocean University of China, Qingdao 266100, China*

\*Corresponding author:

*Tel.: +86 0510 85911123; Fax: +86 0510 85197773*

*E-mail address: wang0628@jiangnan.edu.cn (Dr. Zhenyu Wang)*

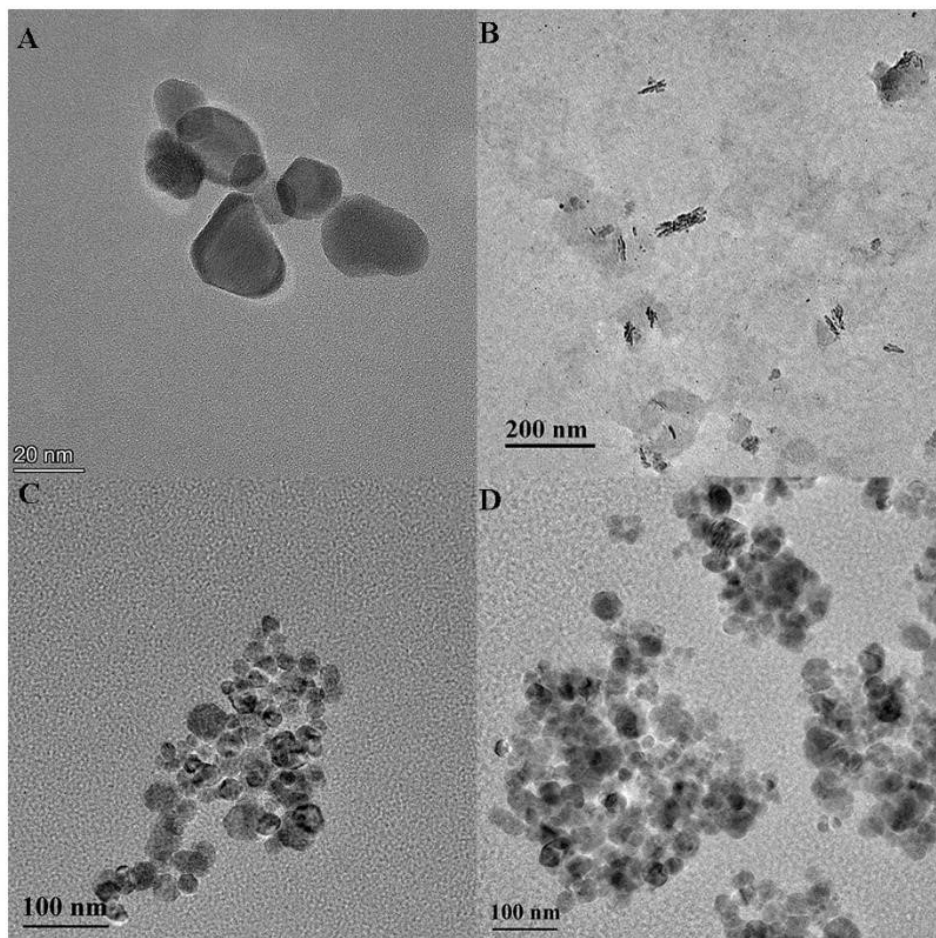

**Fig. S1.** TEM images of four NPs: (A) CeO<sub>2</sub>; (B) La<sub>2</sub>O<sub>3</sub>; (C) Fe<sub>3</sub>O<sub>4</sub>; (D) MnFe<sub>2</sub>O<sub>4</sub>.

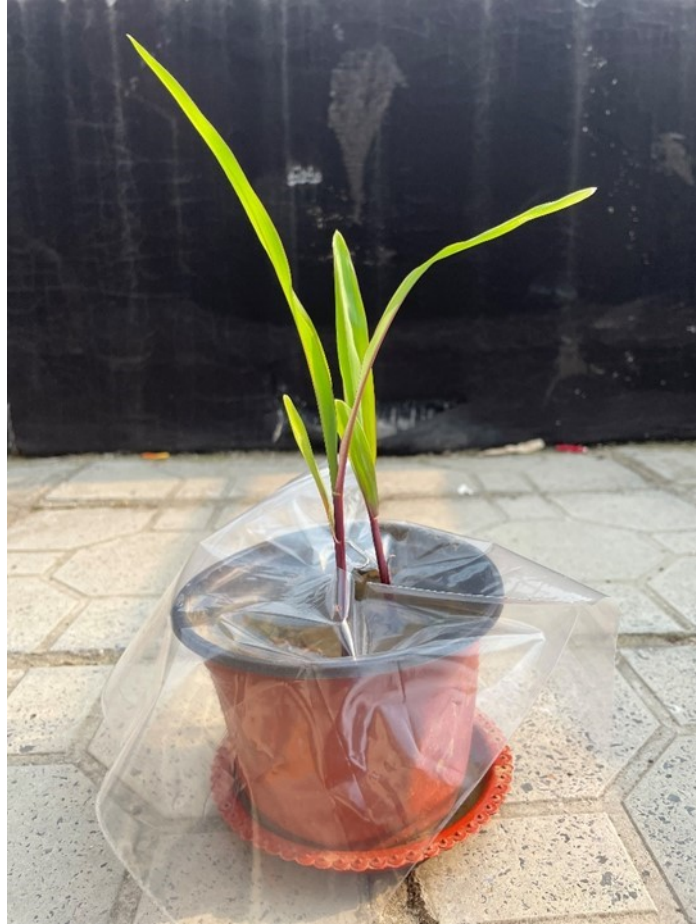

**Fig.S2.** Soil covered with plastic sheet to prevent the NPs entering soil.

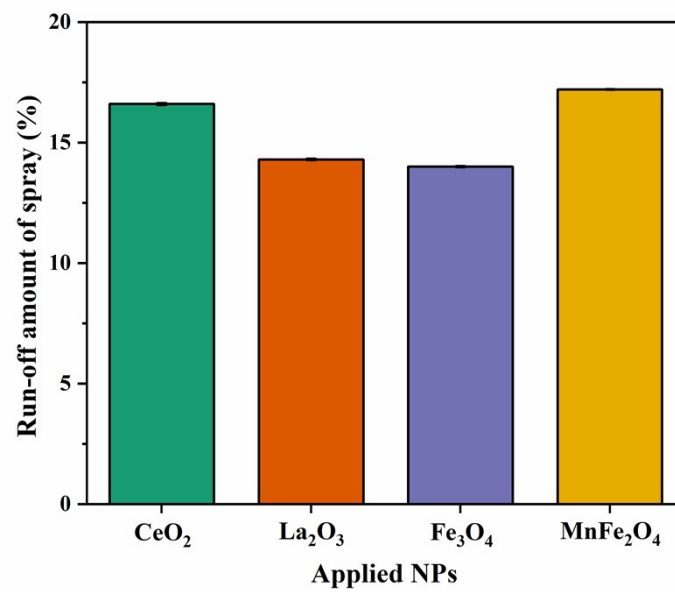

**Fig. S3.** The amount of CeO<sub>2</sub>, La<sub>2</sub>O<sub>3</sub>, Fe<sub>3</sub>O<sub>4</sub> and MnFe<sub>2</sub>O<sub>4</sub> NPs ran off the leaf surface.

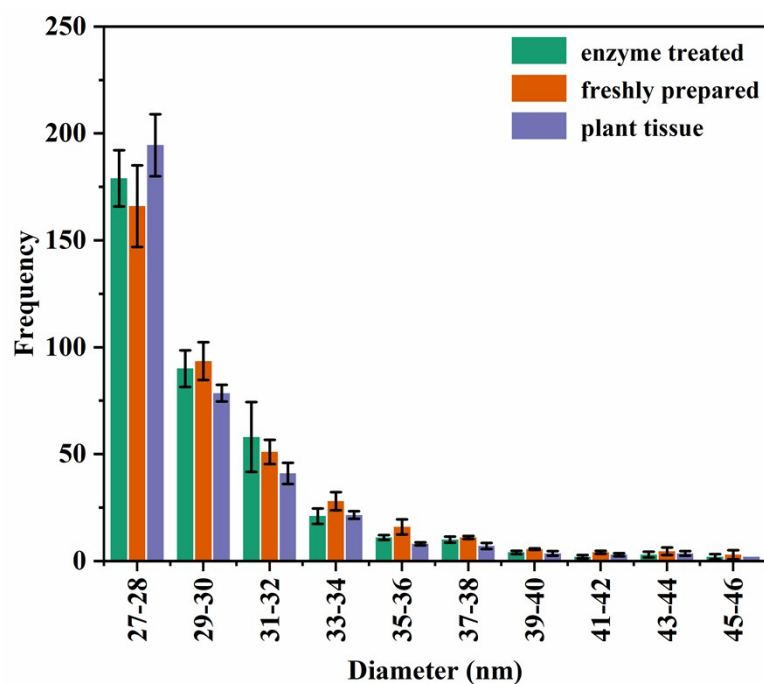

**Fig. S4.** The size distribution of Au NPs after 24-h digestion in enzyme solution, freshly prepared NPs suspensions and in plant tissue digestion solution (kidney bean) by SP-ICP-MS analysis. The final concentration of Au NPs was  $2.4 \times 10^4$  particles  $\text{mL}^{-1}$  theoretically.

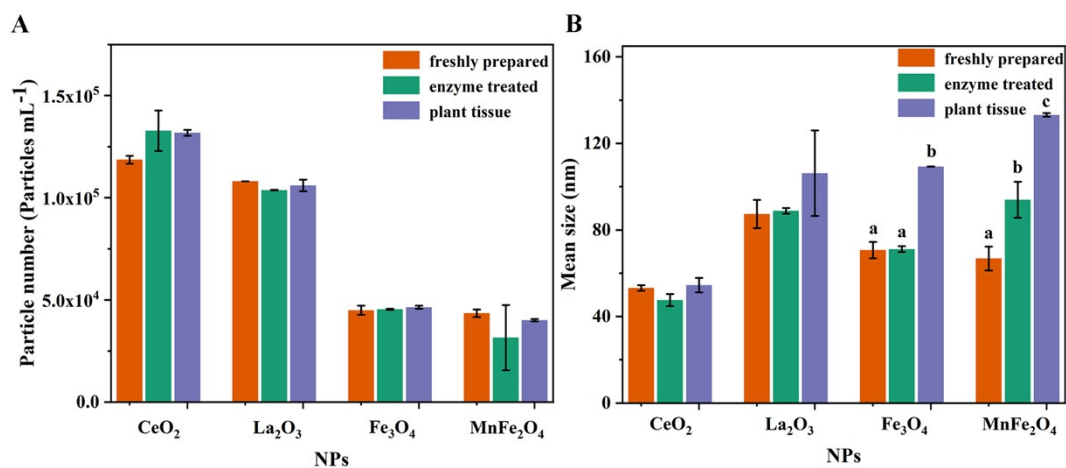

**Fig. S5.** Particle numbers (A) and mean sizes (B) of CeO<sub>2</sub>, La<sub>2</sub>O<sub>3</sub>, Fe<sub>3</sub>O<sub>4</sub> and MnFe<sub>2</sub>O<sub>4</sub> NPs in the freshly prepared NPs suspensions, enzyme treated solution and plant tissue digestion solution. Plant tissue (kidney bean) sample spiked with NPs were digested by macrozyme R-10 enzyme. The values are presented as mean ± SD. The significance level between NPs are indicated by letters “a-c”.

**A: CeO<sub>2</sub> NPs**

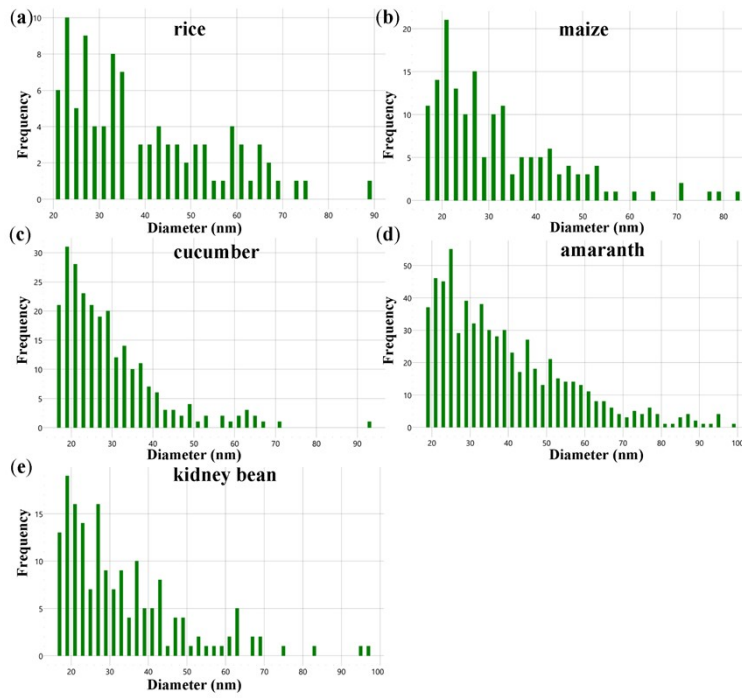

**B: La<sub>2</sub>O<sub>3</sub> NPs:**

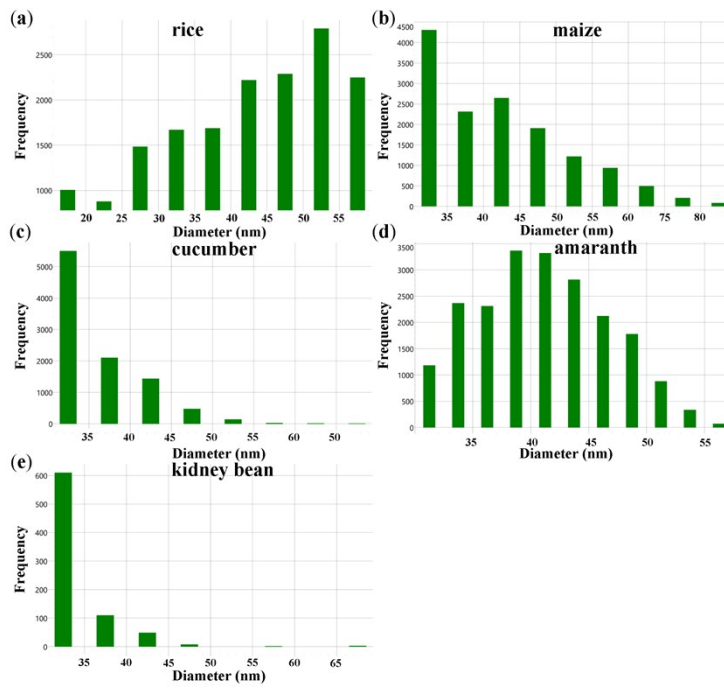

**C: Fe<sub>3</sub>O<sub>4</sub> NPs:**

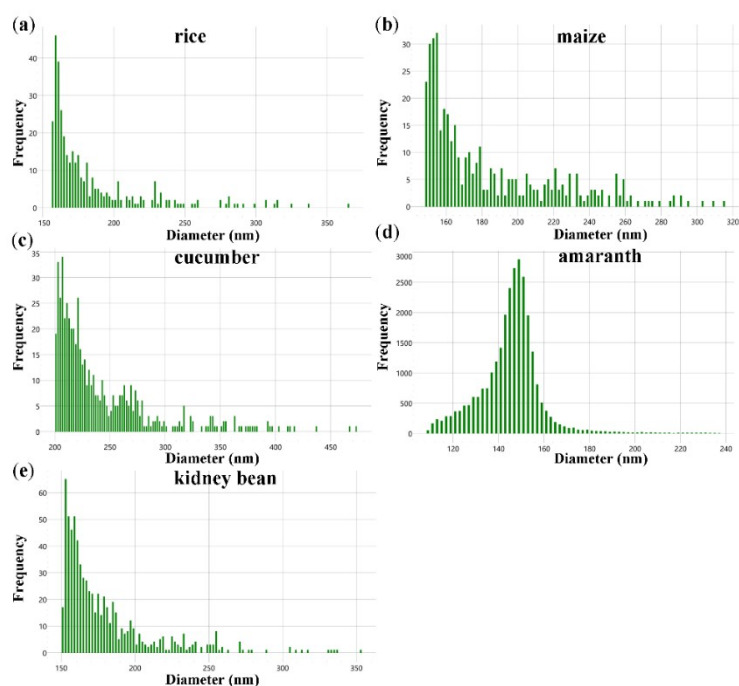

**D: MnFe<sub>2</sub>O<sub>4</sub> NPs:**

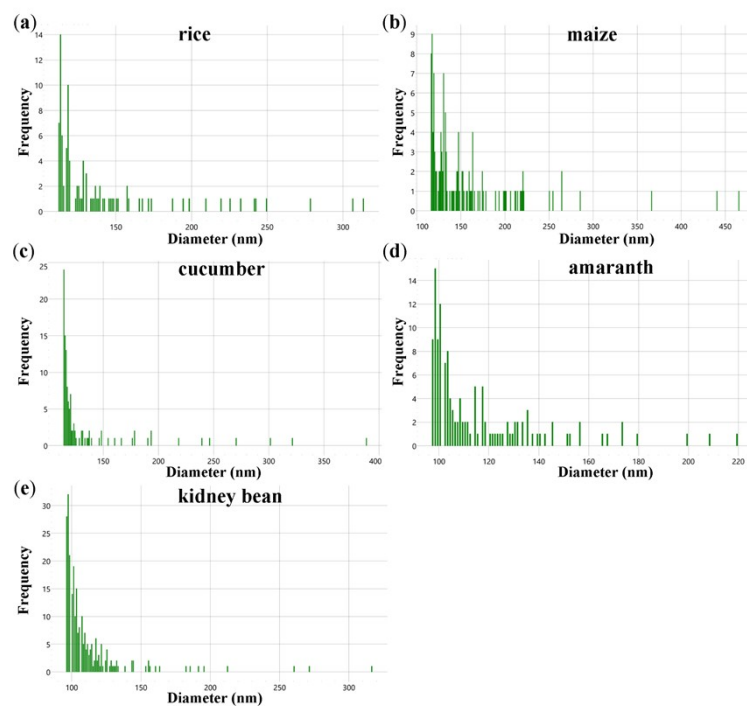

**Fig. S6.** The size distribution of CeO<sub>2</sub> (A), La<sub>2</sub>O<sub>3</sub> (B), Fe<sub>3</sub>O<sub>4</sub> (C) and MnFe<sub>2</sub>O<sub>4</sub> (D) NPs in the dosed leaves of five plants (including (a) rice, (b) maize, (c) cucumber, (d) amaranth and (e) kidney bean) by SP-ICP-MS analysis.



**A: CeO<sub>2</sub> NPs:**

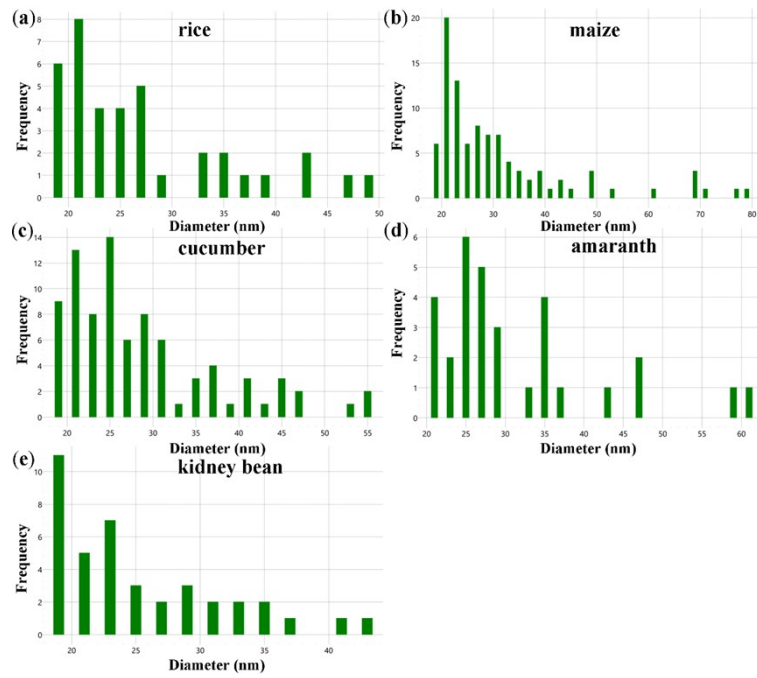

**B: La<sub>2</sub>O<sub>3</sub> NPs:**

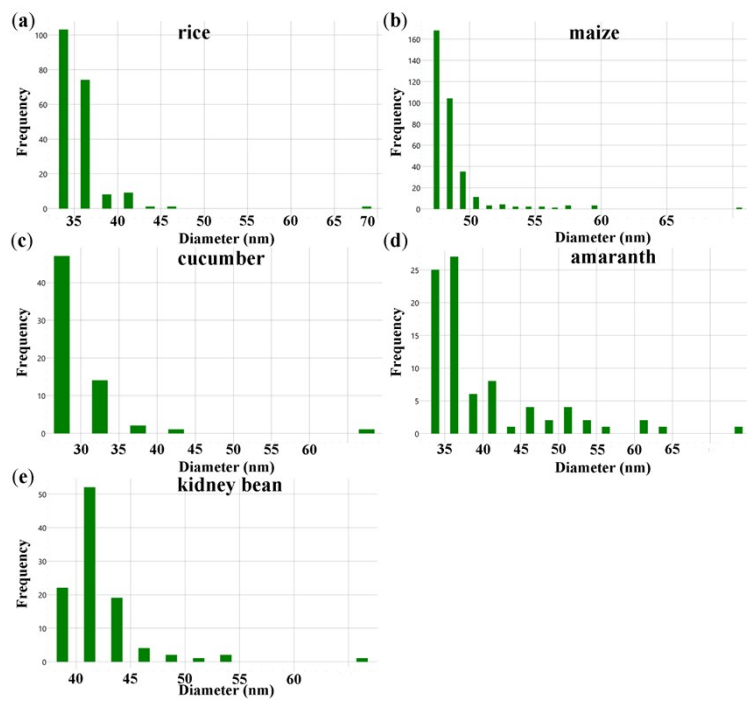

### C: $\text{Fe}_3\text{O}_4$ NPs:

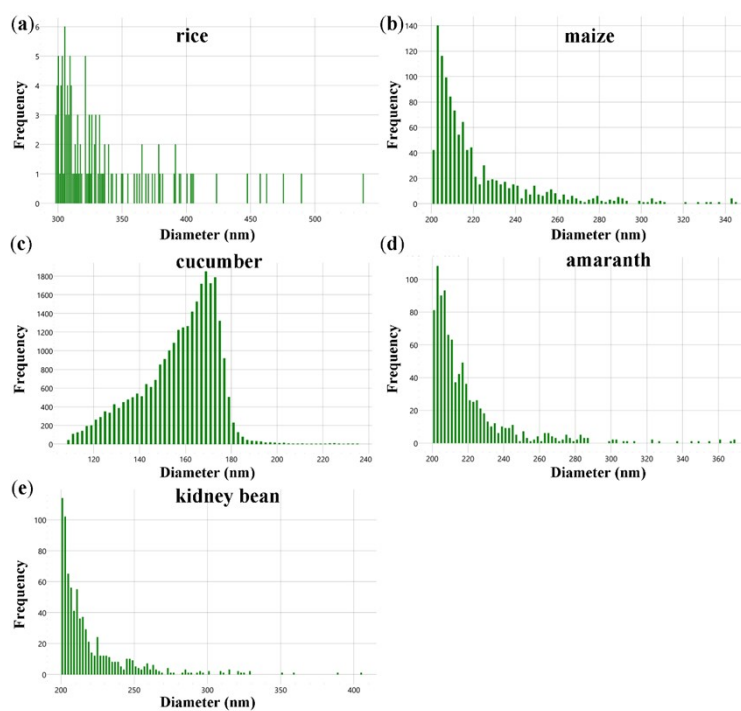

### D: $\text{MnFe}_2\text{O}_4$ NPs:

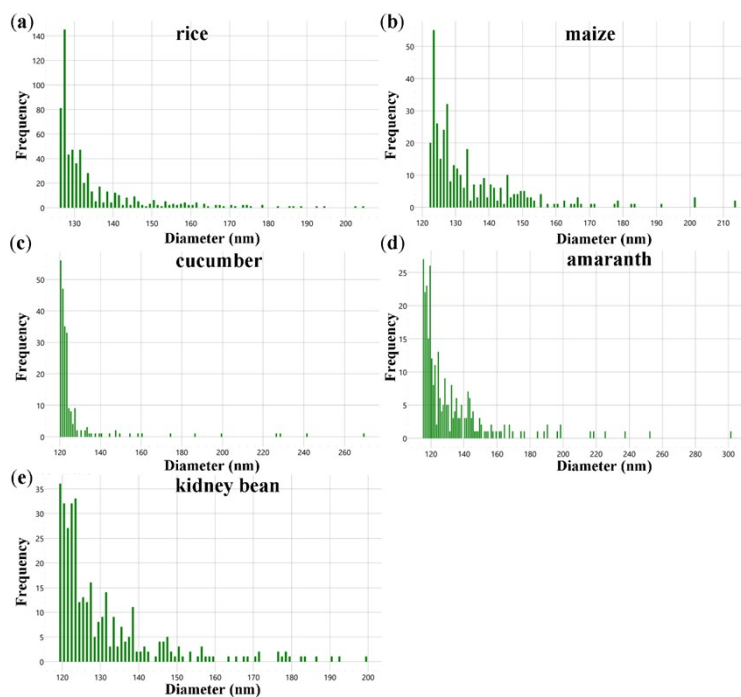

**Fig. S7.** The size distribution of  $\text{CeO}_2$  (A),  $\text{La}_2\text{O}_3$  (B),  $\text{Fe}_3\text{O}_4$  (C) and  $\text{MnFe}_2\text{O}_4$  (D) NPs in the roots of five plants (including (a) rice, (b) maize, (c) cucumber, (d) amaranth and (e) kidney bean) by SP-ICP-MS analysis.

**A: CeO<sub>2</sub> NPs:**

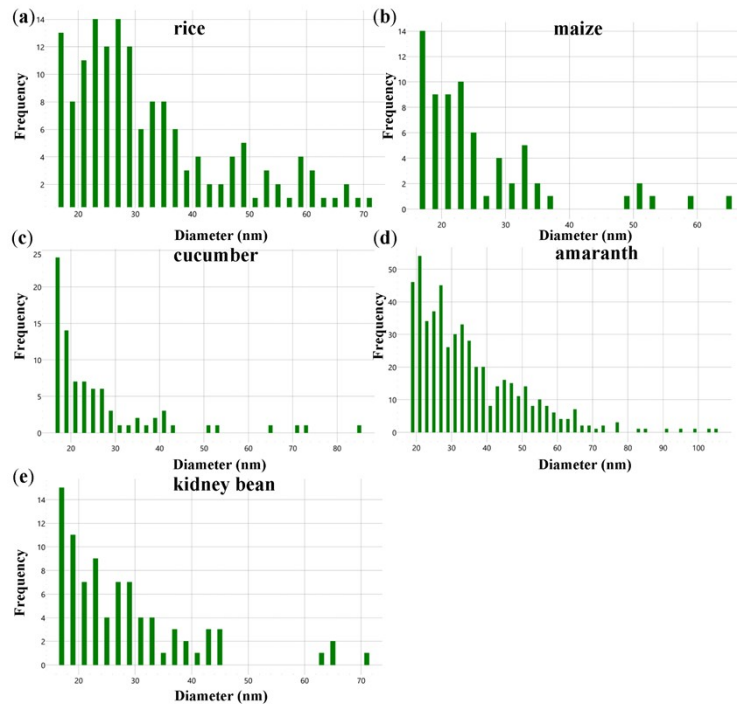

**B: La<sub>2</sub>O<sub>3</sub> NPs:**

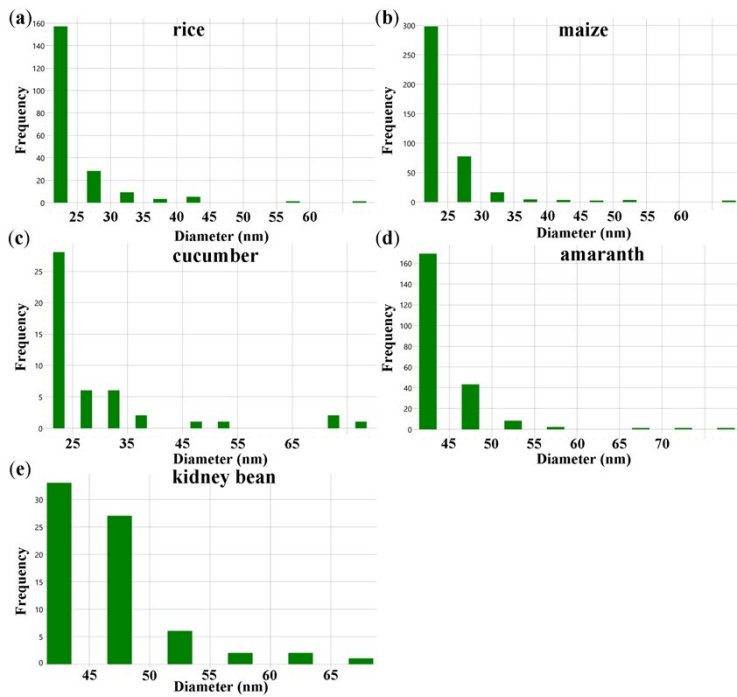

### C: Fe<sub>3</sub>O<sub>4</sub> NPs:

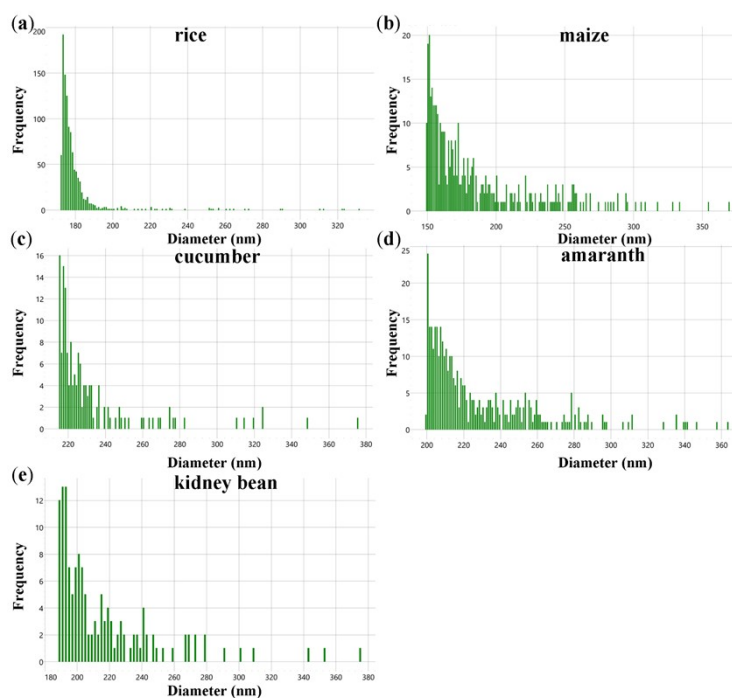

### D: MnFe<sub>2</sub>O<sub>4</sub> NPs:

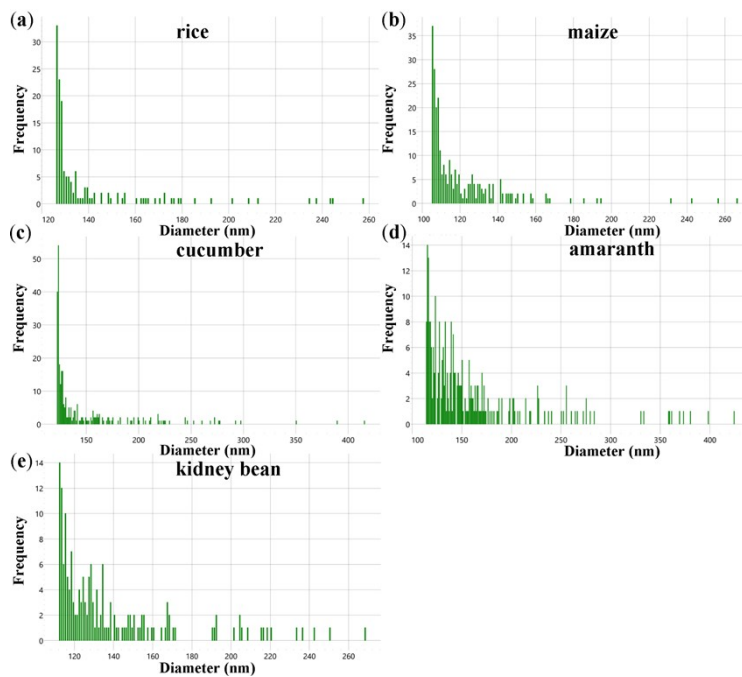

**Fig. S8.** The size distribution of CeO<sub>2</sub> (A), La<sub>2</sub>O<sub>3</sub> (B), Fe<sub>3</sub>O<sub>4</sub> (C) and MnFe<sub>2</sub>O<sub>4</sub> (D) NPs in the new leaves of five plants (including (a) rice, (b) maize, (c) cucumber, (d) amaranth and (e) kidney bean) by SP-ICP-MS analysis.

**Table S1. Size, hydrodynamic diameter and zeta potential of four NPs in ultrapure water (pH= 7.09)**

| Particle                         | Size (nm)                                    | Hydraulic diameter (nm) | Zeta potential (mV) |
|----------------------------------|----------------------------------------------|-------------------------|---------------------|
| CeO <sub>2</sub>                 | 23.40-41.16                                  | 556.77±31.61            | 24.13±1.86          |
| La <sub>2</sub> O <sub>3</sub>   | Width: 14.55 ± 5.98<br>Length: 58.01 ± 28.53 | 855.38±48.22            | 12.92±1.25          |
| Fe <sub>3</sub> O <sub>4</sub>   | 22.39-43.47                                  | 230.65±16.93            | -9.98±4.29          |
| MnFe <sub>2</sub> O <sub>4</sub> | 25.22-59.87                                  | 460.27±7.39             | -8.83±0.44          |

**Table S2. Instrumental parameters for SP-ICP-MS data acquisition.**

| Optimized ICP-MS operating condition     |                   |                   |                                                    |                                                      |
|------------------------------------------|-------------------|-------------------|----------------------------------------------------|------------------------------------------------------|
| Analyte                                  | Ce <sup>140</sup> | La <sup>139</sup> | Fe <sup>56</sup> (Fe <sub>3</sub> O <sub>4</sub> ) | Fe <sup>56</sup> (MnFe <sub>2</sub> O <sub>4</sub> ) |
| Mass fraction (%)                        | 0.81              | 0.85              | 0.72                                               | 0.19                                                 |
| Density (g cm <sup>-3</sup> )            | 7.30              | 6.51              | 5.18                                               | 5.18                                                 |
| Ionization (%)                           | 100               |                   |                                                    |                                                      |
| Dwell time (ms)                          | 3                 |                   |                                                    |                                                      |
| Analysis (scan) time (s)                 | 90                |                   |                                                    |                                                      |
| Sample flow rate (mL min <sup>-1</sup> ) | 0.37              |                   |                                                    |                                                      |
| Wash time (s)                            | 45                |                   |                                                    |                                                      |
| Mode                                     | Standard          | Standard          | KED                                                | KED                                                  |
| Transport efficiency (%)                 | 3.8               |                   |                                                    |                                                      |

**Table S3. Typical sensitivity, detection limits and R<sup>2</sup> for element detection by ICP-MS.**

| Elements | Linearity range<br>(mg/L)/R <sup>2</sup> | Linearity<br>equation   | Detection limit<br>(µg/L) | Bush branches<br>and leaves<br>(GBW07602) | Bush branches and<br>leaves<br>(GBW07602) |
|----------|------------------------------------------|-------------------------|---------------------------|-------------------------------------------|-------------------------------------------|
|          |                                          |                         |                           | Standard value<br>(µg/g)                  | ICP-MS measured<br>value (µg/g, n = 3)    |
| B        | 0-0.1/0.9983                             | y = 32.14x +<br>600.27  | 1.069                     | 34 ± 7                                    | 34± 1                                     |
| Na       | 0-10/0.9999                              | y = 556.08x<br>- 11119  | 3.503                     | 1.10 ± 0.001                              | 1.13± 0.533                               |
| Mg       | 0-10/0.9999                              | y = 235.58x<br>- 10577  | 0.904                     | 2870 ± 180                                | 2746± 238                                 |
| S        | 0-10/1                                   | y = 1338.6x<br>- 12900  | 2.771                     | 3200 ± 300                                | 3081± 192                                 |
| K        | 0-10/0.9999                              | y = 97.3x +<br>1674.4   | 4.701                     | 8500 ± 500                                | 8463± 258                                 |
| Fe       | 0-10/1                                   | y = 87.167x<br>+ 369.72 | 0.514                     | 1020 ± 67                                 | 1043± 55                                  |
| Mn       | 0-0.1/1                                  | y = 1586.3x<br>+ 184.44 | 0.015                     | 58 ± 6                                    | 60± 3                                     |
| Zn       | 0-0.1/0.9997                             | y = 796.47x<br>+ 2066.6 | 0.247                     | 20.3 ± 2.2                                | 21± 0.9                                   |
| La       | 0-0.1/1                                  | y = 2851.6x<br>- 683.65 | 0.001                     | 1.23 ± 0.10                               | 1.21± 0.10                                |
| Ce       | 0-0.1/0.9997                             | y = 65841x<br>+ 22753   | 0.001                     | 2.4 ± 0.3                                 | 2.5± 0.3                                  |

**Table S4. The particle concentration (particles mg<sup>-1</sup>) and sizes of four NPs in the control plants without NPs exposure detected by SP-ICP-MS**

**A: rice**

| Particle                         | Category    | Dosed leaves | New leaves   | Roots        |
|----------------------------------|-------------|--------------|--------------|--------------|
| CeO <sub>2</sub>                 | Number      | 3797±52      | 4604±63      | 3651±50      |
|                                  | Size (nm)   | 25.29±8.1    | 30.66±10.84  | 25.57±7.1    |
| La <sub>2</sub> O <sub>3</sub>   | Number      | 1679±23      | 1461±20      | 4948±68      |
|                                  | Length (nm) | 93.35±15.24  | 261.68±35.52 | 51.49±14.15  |
| Fe <sub>3</sub> O <sub>4</sub>   | Number      | 1020±14      | 1751±24      | 3138±43      |
|                                  | Size (nm)   | 117.15±8.64  | 125.58±20.19 | 121.03±9.02  |
| MnFe <sub>2</sub> O <sub>4</sub> | Number      | 5764±79      | 2552±35      | 7007±96      |
|                                  | Size (nm)   | 118.72±11.14 | 125.32±8.43  | 125.71±10.73 |

**B: maize**

| Particle                         | Category    | Dosed leaves | New leaves   | Roots        |
|----------------------------------|-------------|--------------|--------------|--------------|
| CeO <sub>2</sub>                 | Number      | 2627±36      | 3942±54      | 6191±85      |
|                                  | Size (nm)   | 22.18±3.71   | 25.02±5.99   | 29.14±6.44   |
| La <sub>2</sub> O <sub>3</sub>   | Number      | 2409±33      | 1386±19      | 1457±20      |
|                                  | Length (nm) | 101.91±22.14 | 308.81±35.63 | 121.52±18.96 |
| Fe <sub>3</sub> O <sub>4</sub>   | Number      | 1459±20      | 2480±34      | 2043±28      |
|                                  | Size (nm)   | 126.65±15.44 | 118.99±16.32 | 123.54±9.12  |
| MnFe <sub>2</sub> O <sub>4</sub> | Number      | 7632±105     | 2553±35      | 5694±78      |
|                                  | Size (nm)   | 110.83±16.32 | 125.15±10.78 | 125.36±10.28 |



**C: cucumber**

| Particle                         | Category    | Dosed        | New leaves   | Roots        |
|----------------------------------|-------------|--------------|--------------|--------------|
| CeO <sub>2</sub>                 | Number      | 6199±85      | 5543±76      | 7153±98      |
|                                  | Size (nm)   | 26.42±8.21   | 27.11±9.28   | 32.7±6.66    |
| La <sub>2</sub> O <sub>3</sub>   | Number      | 3574±49      | 2409±33      | 5769±79      |
|                                  | Length (nm) | 91.56±18.36  | 218.40±34.58 | 122.60±23.36 |
| Fe <sub>3</sub> O <sub>4</sub>   | Number      | 1240±17      | 3433±47      | 5037±69      |
|                                  | Size (nm)   | 121.07±12.43 | 132.06±12.28 | 127.59±4.47  |
| MnFe <sub>2</sub> O <sub>4</sub> | Number      | 4593±63      | 3943±54      | 5980±82      |
|                                  | Size (nm)   | 125.61±9.8   | 125.64±9.19  | 144.4±6.8    |

**D: amaranth**

| Particle                         | Category    | Dosed leaves | New leaves   | Roots       |
|----------------------------------|-------------|--------------|--------------|-------------|
| CeO <sub>2</sub>                 | Number      | 2992±41      | 4597±63      | 6932±95     |
|                                  | Size (nm)   | 28.84±5.48   | 27.78±8.44   | 27.10±5.84  |
| La <sub>2</sub> O <sub>3</sub>   | Number      | 4524±62      | 1095±15      | 3719±51     |
|                                  | Length (nm) | 115.70±19.39 | 292.66±37.45 | 84.19±13.66 |
| Fe <sub>3</sub> O <sub>4</sub>   | Number      | 3063±42      | 1315±18      | 4011±55     |
|                                  | Size (nm)   | 116.69±8.07  | 117.64±9.73  | 140.91±7.73 |
| MnFe <sub>2</sub> O <sub>4</sub> | Number      | 3724±51      | 2994±41      | 6050±83     |
|                                  | Size (nm)   | 144.06±9.16  | 122.54±15.33 | 134.5±6.57  |

**E: kidney bean**

| Particle                         | Category    | Dosed leaves | New leaves   | Roots        |
|----------------------------------|-------------|--------------|--------------|--------------|
| CeO <sub>2</sub>                 | Number      | 2401±33      | 3719±51      | 3429±47      |
|                                  | Size (nm)   | 22.86±3.99   | 30.88±10.67  | 24.17±5.17   |
| La <sub>2</sub> O <sub>3</sub>   | Number      | 3675±52      | 949±13       | 3721±51      |
|                                  | Length (nm) | 82.43±23.99  | 236.21±30.67 | 72.78±9.17   |
| Fe <sub>3</sub> O <sub>4</sub>   | Number      | 1533±21      | 2185±30      | 3502±48      |
|                                  | Size (nm)   | 124.36±11.34 | 113.04±14.78 | 126.57±9.61  |
| MnFe <sub>2</sub> O <sub>4</sub> | Number      | 6640±91      | 2774±38      | 4088±56      |
|                                  | Size (nm)   | 110.41±10.54 | 125.93±7.18  | 124.61±11.03 |
